## ERRATUM

**Restoration of synapse formation in *Musk* mutant mice expressing a Musk/Trk chimeric receptor**

Herbst, R., Avetisova, E. and Burden, S. J. *Development* **129**, 5449-5460

On page 5454 of this article, the first paragraph in the section 'Motor axons extend...' should read 'Based on the expression of transgenes containing the MCK enhancer and promoter, the endogenous *MCK* gene is activated in skeletal muscle at ~E13.5 (S. Hauschka, personal communication), 1 day after motor axons first enter the muscle.'

We apologise to the authors and readers for this mistake.

## CORRIGENDUM

**Kremen proteins interact with Dickkopf1 to regulate anteroposterior CNS patterning**

Davidson, G., Mao, B., del Barco Barrantes, I. and Niehrs, C. *Development* **129**, 5587-5596.

In the reference list and text, one of the references was mis-spelled.

The correct reference is **Lekven**, A. C., Thorpe, C. J., Waxman, J. S. and Moon, R. T. (2001). Zebrafish *wnt8* encodes two proteins on a bicistronic transcript and is required for mesoderm and neurectoderm patterning. *Dev. Cell* **1**, 103-114.

The authors apologise to readers for this mistake.

## CORRIGENDUM

**Quantitative developmental anatomy of definitive haematopoietic stem cells/long-term repopulating units (HSC/RUs): role of the aorta-gonad-mesonephros (AGM) region and the yolk sac in colonisation of the mouse embryonic liver**

Kumaravelu, P., Hook, L., Morrison, A. M., Ure, J., Zhao, S., Zuyev, S., Ansell, J. and Medvinsky, A. *Development* **129**, 4891-4899.

There is an error in Fig. 1A of this article. The correct version of the figure is printed below.

The authors apologise to readers for this mistake.

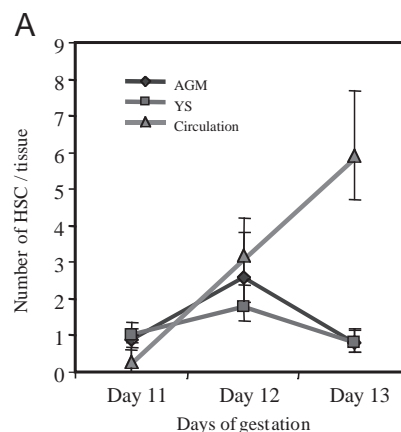

Source: https://cob.silverchair.com/dev/article-pdf/130/2/425/1591559/425.pdf
